# Supplementary material for: Tribological gain enabled by the synergy of copper nanoparticles and friction induced in situ tribo-click reaction
Source: Royal Society of Chemistry journal article supplement (doi:10.1039/d2ta06570c), 2022-01-01
Supplement: d2ta06570c1.pdf [file d2ta06570c1.pdf]

## Supporting information

### **Tribological gain enabled by synergy of copper nanoparticles and friction induced in-situ tribo-click reaction**

*Hao-Zhe Xu<sup>a,b</sup>, Luyao Bao<sup>b</sup>, Xin-Gang Wang<sup>b\*</sup>, Rui Dong<sup>b</sup>, Ao Xie<sup>b</sup>, Qiangliang Yu<sup>b</sup>,  
Qiang Chen<sup>c</sup>, Meirong Cai<sup>b,c\*</sup>, Feng Zhou<sup>b</sup>, Yong-Min Liang<sup>a\*</sup> and Weimin Liu<sup>b</sup>*

<sup>a</sup> State Key Laboratory of Applied Organic Chemistry, School of Chemistry and  
Chemical Engineering, Lanzhou University, Lanzhou 730000, P. R. China

<sup>b</sup> State Key Laboratory of Solid Lubrication, Lanzhou Institute of Chemical Physics,  
Chinese Academy of Sciences, Lanzhou 730000, P. R. China

<sup>c</sup> Shandong Laboratory of Yantai Advanced Materials and Green Manufacturing,  
Yantai 264006, China.

\*Corresponding Authors: [caimr@licp.cas.cn](mailto:caimr@licp.cas.cn) (M. Cai)

[wangxingang@licp.cas.cn](mailto:wangxingang@licp.cas.cn) (X.G. Wang)

[liangym@lzu.edu.cn](mailto:liangym@lzu.edu.cn) (Y.M. Liang)

## Table of Contents

|                                                                                                  |    |
|--------------------------------------------------------------------------------------------------|----|
| 1. Experimental section .....                                                                    | 1  |
| 2. Coefficient of Friction for different variables in the in-situ tribo-click system .....       | 6  |
| 3. 3D morphologies of worn scars for different variables in the in-situ tribo-click system ..... | 8  |
| 4. The XPS survey spectra of in-situ tribo-click system: .....                                   | 10 |
| 5. The EDS linear scanning spectra: C, Pt, S.....                                                | 11 |
| 6. The morphology of copper nanoparticles .....                                                  | 13 |
| 7. The XPS spectra of copper nanoparticles .....                                                 | 14 |
| References.....                                                                                  | 15 |

## 1. Experimental section

**The synthesis of 1-(2-propynyl)-3-methyl-imidazolium trifluoromethanesulfonate ([PMIM]OTf):** [PMIM]OTf was synthesized according to the previous works with some modifications<sup>1</sup>. 3-Bromopropyne (4.926 g, 60 mmol, 1.2 equiv) was dissolved in toluene (50 mL). 1-Methylimidazole (5.948 g, 50 mmol, 1 equiv) was dropped into the solution at 0 °C. The solution was stirred overnight, and the temperature gradually returned to room temperature. Remove the solvent in vacuo to obtain 77% [PMIM]Br (3-methyl-1-propargylimidazolium bromide). Subsequently, the [PMIM]Br was dissolved in water, and then the equivalent Silver(I) trifluoromethanesulfonate was added into the solution at 50 °C according to the previous works with some modifications. After filtering out the solid, remove the solvent in vacuo to obtain 90% [PMIM]OTf.

**([PMIM]OTf):** <sup>1</sup>H NMR (400 MHz, DMSO-d<sub>6</sub>) δ 9.19 (d, *J* = 1.8 Hz, 1H), 7.78 (t, *J* = 1.9 Hz, 1H), 7.74 (t, *J* = 1.8 Hz, 1H), 5.19 (d, *J* = 2.6 Hz, 2H), 3.88 (s, 3H), 3.83 (t, *J* = 2.6 Hz, 1H).

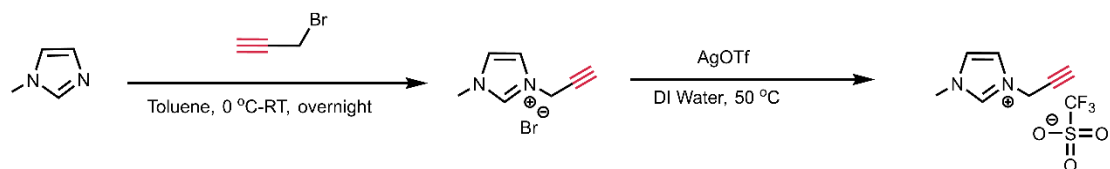

**Fig. S1** The synthesis of [PMIM]OTf.

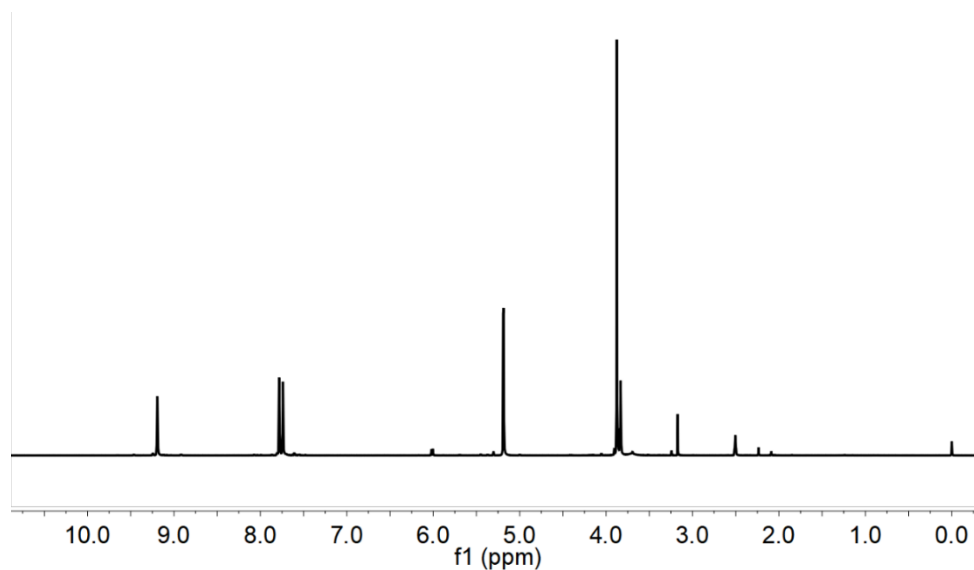

**Fig. S2** The  $^1\text{H}$  NMR spectra of [PMIM]OTf.

**The synthesis of 1-azidododecane:** Sodium azides (1.561 g, 24 mmol, 1.2 equiv) and 1-bromododecane (4.962 g, 20 mmol, 1 equiv) was dissolved in DMSO (50 mL). After stirring 12 h at 60 °C, the solution was washed by water and then extracted with methylene chloride, and 1-azidododecane was given by removing the solvent in vacuo. The yields of 1-azidododecane were 90 %.

**1-azidododecane:**  $^1\text{H}$  NMR (400 MHz, Chloroform-d)  $\delta$  3.25 (t,  $J = 7.0$  Hz, 2H), 1.60 (p,  $J = 7.0$  Hz, 2H), 1.40 – 1.20 (m, 18H), 0.93 – 0.83 (m, 3H).

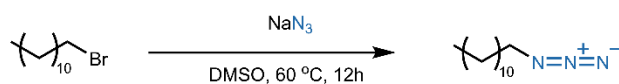

**Fig. S3** The synthesis of 1-azidododecane.

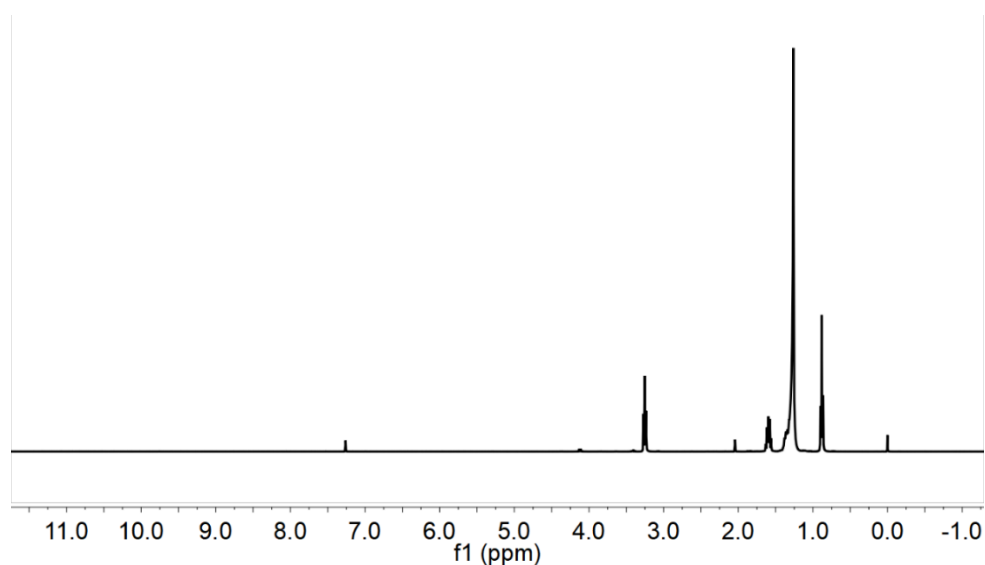

**Fig. S4** The  $^1\text{H}$  NMR spectra of 1-azidododecane.

**The synthesis of 3-Azido-7-hydroxycoumarin:** 3-Azido-7-hydroxycoumarin was synthesized according to the previous works with some modifications<sup>2</sup>. A mixture of 2,4-dihydroxy benzaldehyde (2.76 g, 20 mmol), *N*-acetylglycine (2.34 g, 20 mmol), anhydrous sodium acetate (60 mmol) in acetic anhydride (100 mL) was refluxed under stirring for 4 h. The reaction mixture was poured onto ice to give a yellow precipitate. After filtration, the yellow solid was washed by ice water before it was refluxed in a solution of conc. HCl and ethanol (2:1, 30 mL) for 1 hour, then ice water (40 mL) was added to dilute the solution. The solution was then cooled in an ice bath and  $\text{NaNO}_2$  (40 mmol) was added. The mixture was stirred for 5-10 minutes and  $\text{NaN}_3$  (60 mmol) was added in portions. After stirring for another 15 minutes, the resulting precipitate was filtered off, washed with water, and dried under reduced pressure to afford a brown solid; 1.75 g (43% overall yield). The product was pure enough for further reactions.

**3-Azido-7-hydroxycoumarin:**  $^1\text{H}$  NMR (400 MHz, DMSO- $d_6$ )  $\delta$  10.54 (s, 1H), 7.59 (s, 1H), 7.48 (d,  $J = 8.6$  Hz, 1H), 6.81 (dd,  $J = 8.5, 2.3$  Hz, 1H), 6.76 (d,  $J = 2.3$  Hz, 1H).

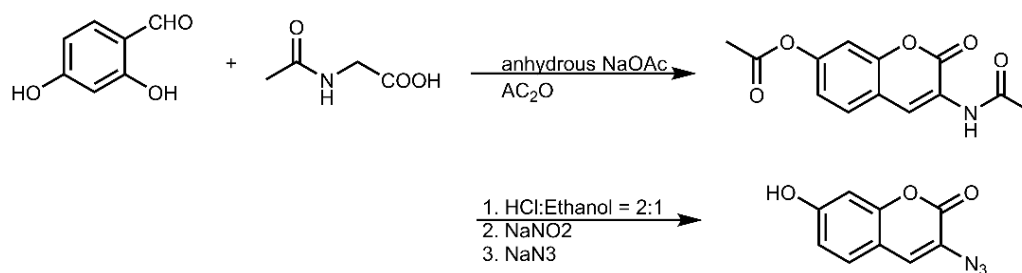

**Fig. S5** The synthesis of 3-Azido-7-hydroxycoumarin.

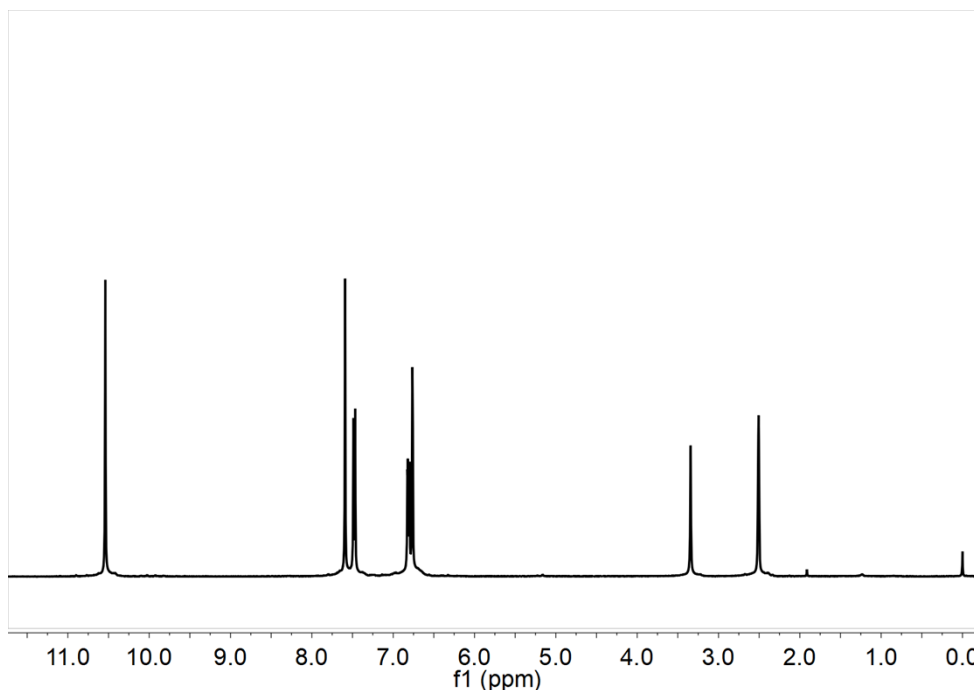

**Fig. S6** The  $^1\text{H}$  NMR spectra of 3-Azido-7-hydroxycoumarin.

**The synthesis of 3-((1-dodecyl-1H-1,2,3-triazol-4-yl) methyl)-1-methyl-1H-imidazol-3-ium trifluoromethanesulfonate ([DTYIm]OTf):** [PMIM]OTf (3.242 g, 10 mmol, 1.2 equiv) and 1-azidododecane (1,663 g, 10 mmol 1 equiv) were dissolved in DMSO (50 mL), After stirring 6 h at 50 °C, the solution was washed by water and then extracted with methylene chloride. After filtering out the solid, remove the solvent in vacuo to obtain 68% product.

**[DTYIm]OTf:**  $^1\text{H}$  NMR (400 MHz, DMSO- $d_6$ )  $\delta$  9.18 (d,  $J = 1.8$  Hz, 1H), 8.24 (s, 1H), 7.75 (d,  $J = 1.8$  Hz, 1H), 7.71 (t,  $J = 1.8$  Hz, 1H), 5.52 (s, 2H), 4.36 (t,  $J = 7.1$  Hz,

2H), 3.86 (s, 3H), 1.80 (p,  $J = 7.2$  Hz, 2H), 1.24 (d,  $J = 4.6$  Hz, 18H), 0.88 – 0.83 (m, 3H).

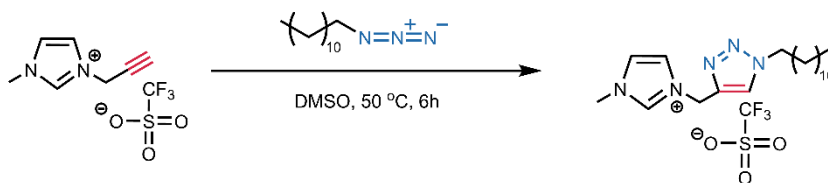

**Fig. S7** The synthesis of [PMIM]OTf.

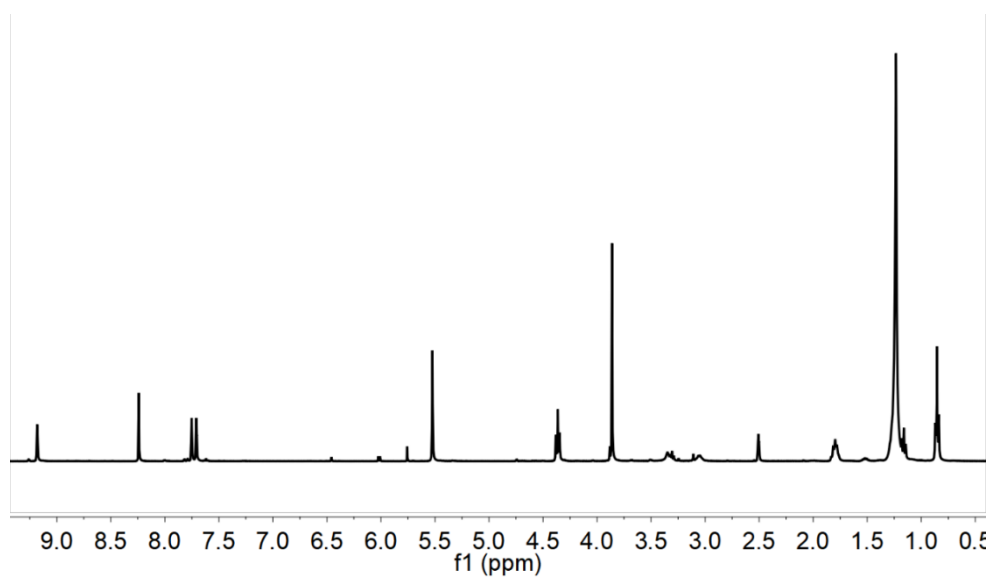

**Fig. S8** The  $^1\text{H}$  NMR spectra of [PMIM]OTf.

## 2. Coefficient of Friction for different variables in the in-situ tribo-click system

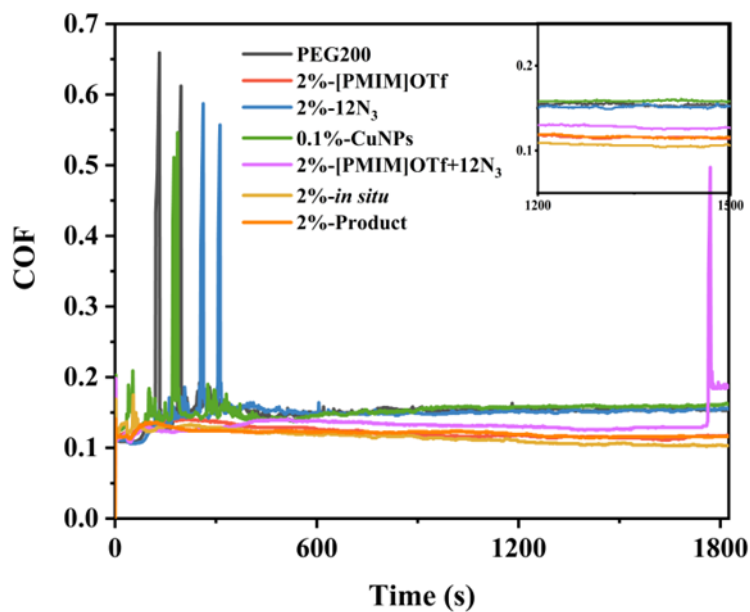

Fig. S9 COF curves of the in-situ tribo-click system in PEG200 (The mini-figure is an enlargement of the corresponding position).

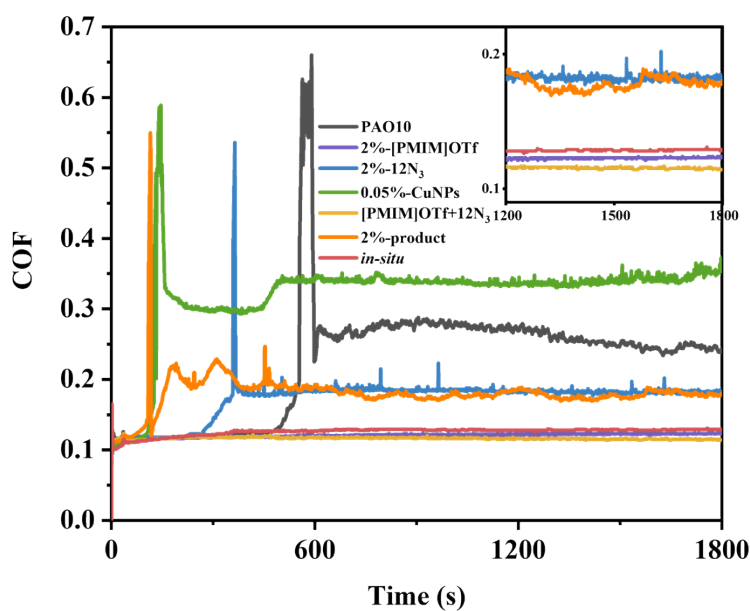

Fig. S10 COF curves of the in-situ tribo-click system in PAO10 (The mini-figure is an enlargement of the corresponding position).



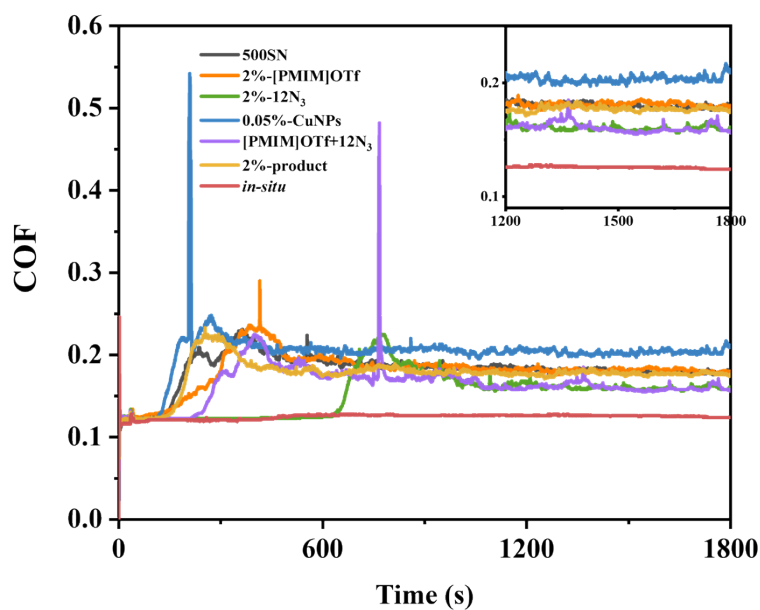

**Fig. S11** COF curves of the in-situ tribo-click system in 500SN (The mini-figure is an enlargement of the corresponding position).

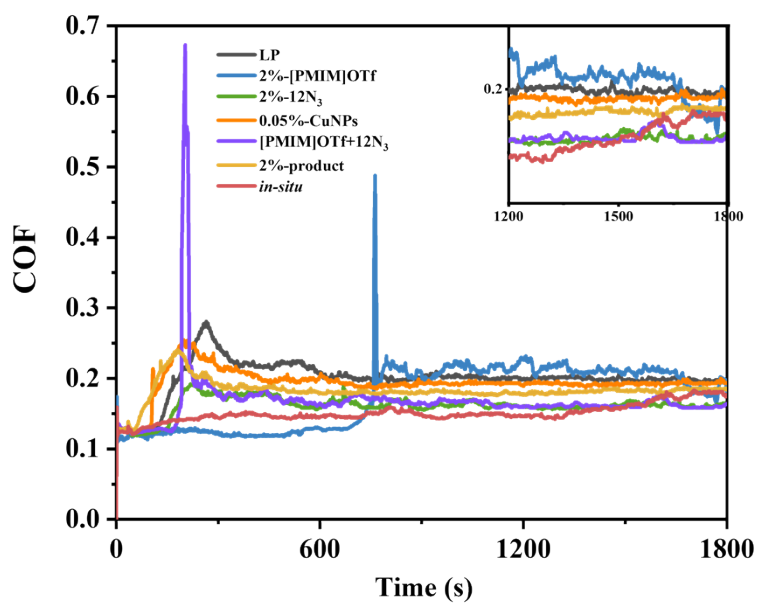

**Fig. S12** COF curves of the in-situ tribo-click system in liquid paraffin (The mini-figure is an enlargement of the corresponding position).

### 3. 3D morphologies of worn scars for different variables in the in-situ tribo-click system

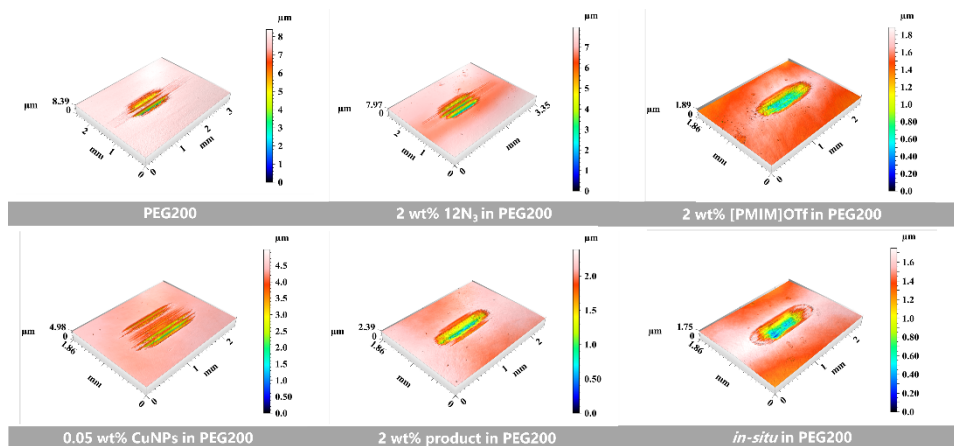

Fig. S13 3D morphologies of worn scars for different variables in the in-situ tribo-click system with the base oil PEG200.

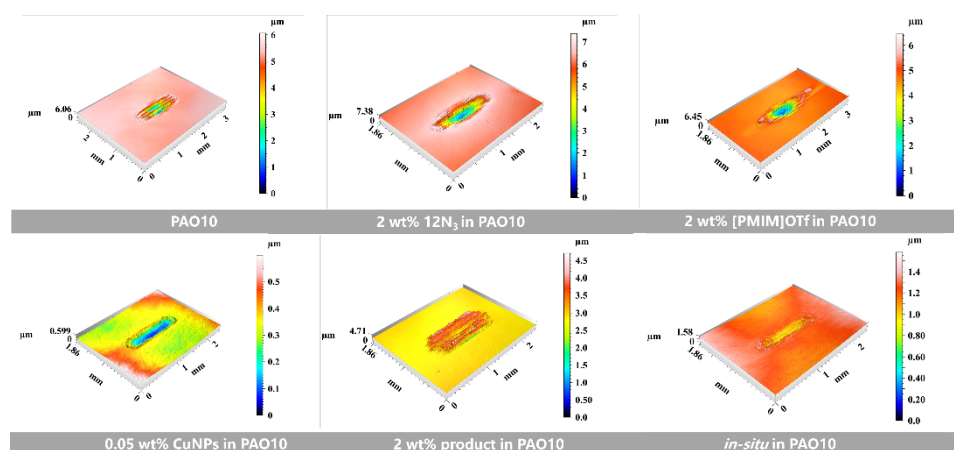

Fig. S14 3D morphologies of worn scars for different variables in the in-situ tribo-click system with the base oil PAO10.

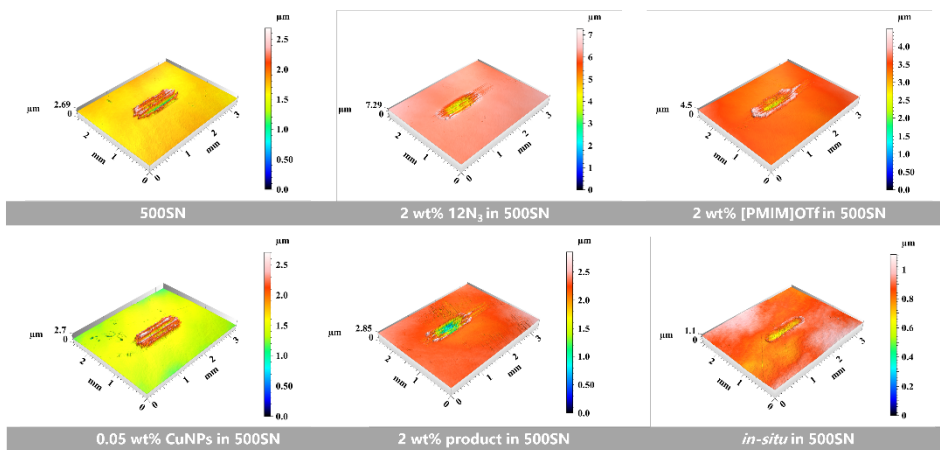

**Fig. S15** 3D morphologies of worn scars for different variables in the in-situ tribo-click system with the base oil 500SN.

#### 4. The XPS survey spectra of in-situ tribo-click system:

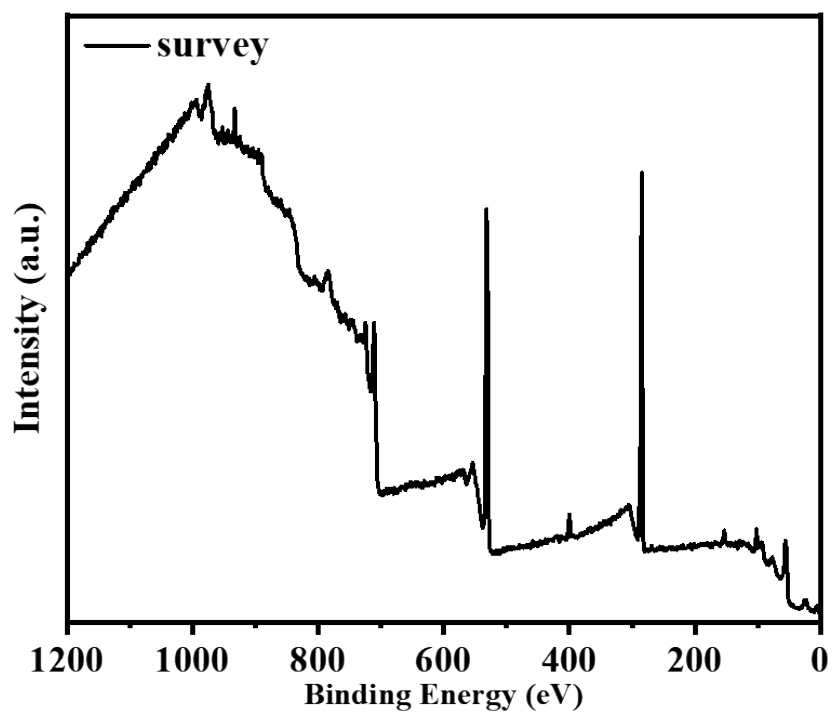

Fig. S16 The XPS survey spectra of in-situ tribo-click system.

## 5. The EDS linear scanning spectra: C, Pt, S

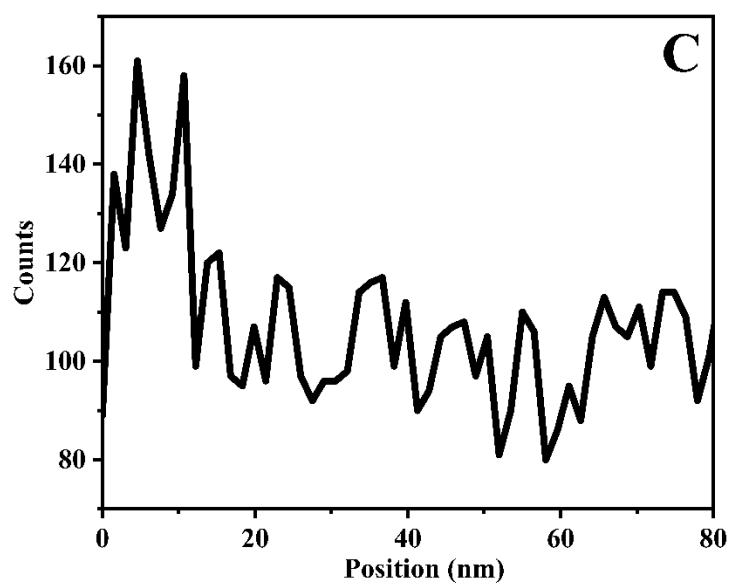

Fig. S17 The EDS linear scanning spectra of C.

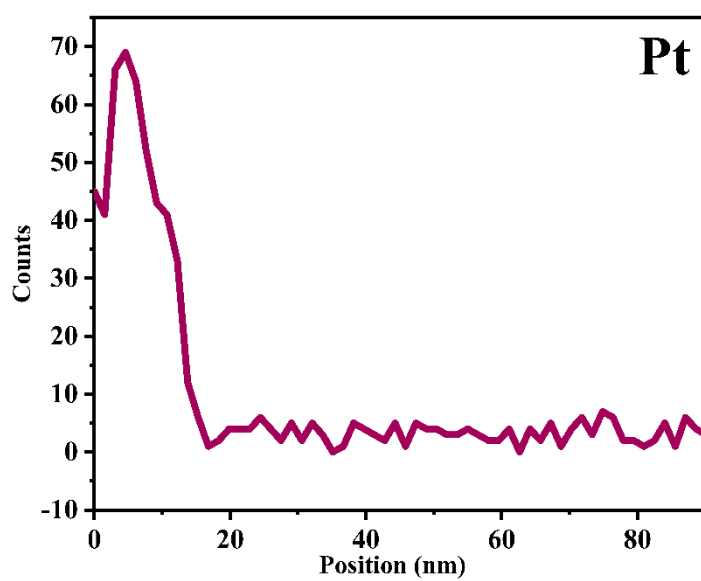

Fig. S18 The EDS linear scanning spectra of Pt.

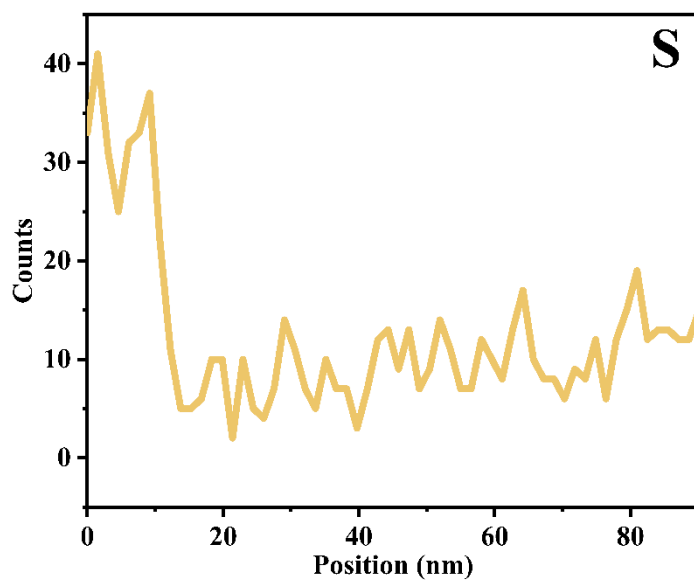

**Fig. S19** The EDS linear scanning spectra of S.

## 6. The morphology of copper nanoparticles

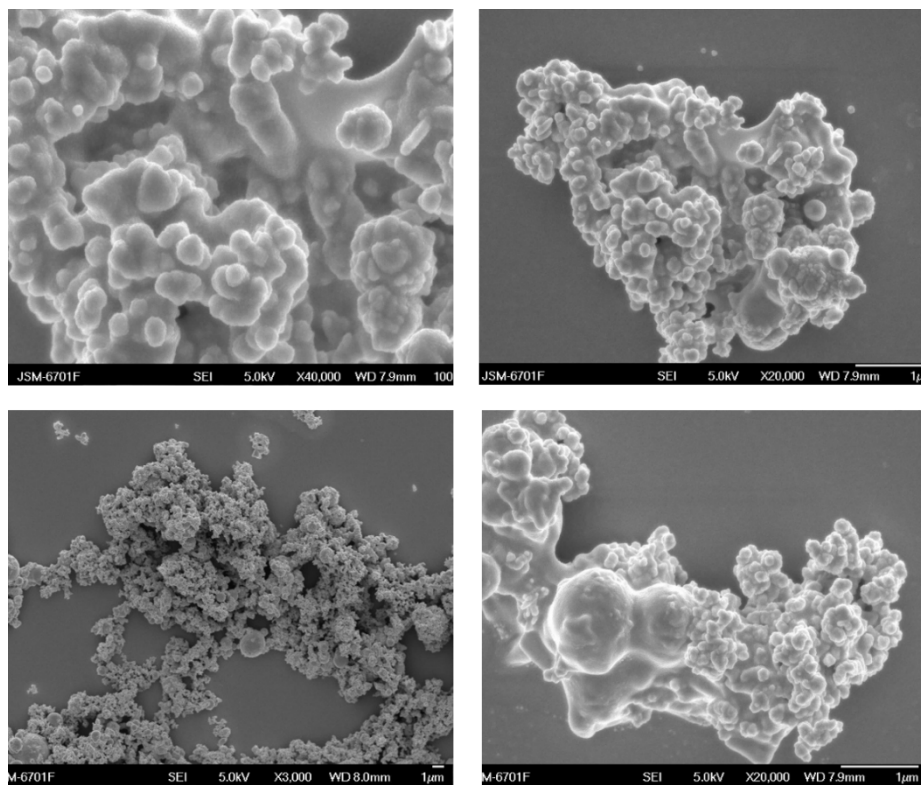

**Fig. S20** SEM images of Copper Nanoparticles at different magnifications.

## 7. The XPS spectra of copper nanoparticles

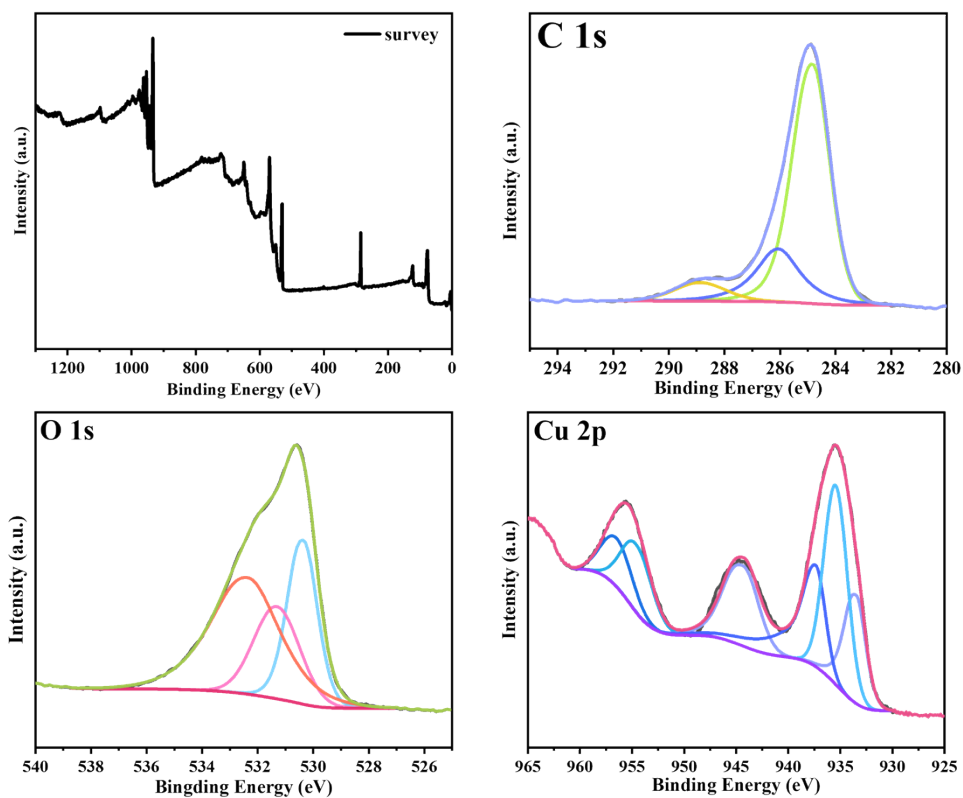

**Fig. S21** XPS spectra of Copper Nanoparticles.



## References

1. S. Ravula, N. E. Larm, Y. Liu, J. L. Atwood, S. N. Baker and G. A. Baker, *New Journal of Chemistry*, 2018, **42**, 1979-1986.
2. K. Sivakumar, F. Xie, B. M. Cash, S. Long, H. N. Barnhill and Q. Wang, *Organic Letters*, 2004, **6**, 4603-4606.
